# Supplementary material
Source: ML conference proceedings conference paper supplement (https://proceedings.neurips.cc/paper_files/paper/2019/hash/4fc28b7093b135c21c7183ac07e928a6-Abstract.html)
Supplement: Supplementary file [file 4fc28b7093b135c21c7183ac07e928a6-Supplemental.zip]

---

# Supplementary Material: Depth-First Proof-Number Search with Heuristic Edge Cost and Application to Chemical Synthesis Planning

---

Anonymous Author(s)

Affiliation

Address

email

## 1 Example of DFPN

When basic PNS updates a tree after generating nodes  $H$  and  $I$  illustrated in Figure 1 (right),  $pn(A)$ ,  $pn(C)$ ,  $pn(F)$  remain unchanged. PNS traverses path  $A \rightarrow C \rightarrow F$  again when it attempts to find a leaf node to expand next, starting from  $A$ .

DFPN addresses re-expansions of nodes  $A$ ,  $C$  and  $F$  by introducing the thresholds of the proof and disproof numbers  $th_{pn}(n)$  and  $th_{dn}(n)$  [2]. DFPN keeps examining the search space rooted at node  $n$  as long as it holds that  $pn(n) < th_{pn}(n) \wedge dn(n) < th_{dn}(n)$ .

In Figure 2, we illustrate an example of updating  $th_{pn}(n)$ . For the sake of simplicity, we deal with only  $th_{pn}(n)$ , since  $th_{dn}(n)$  is updated in an analogous way.

DFPN’s  $th_{pn}(n)$  is used to decide whether DFPN needs to select a different path than the current one. In Figure 2(left), DFPN starts with  $th_{pn}(A) = \text{MAXVAL}$ , which is a large value indicating that DFPN keeps examining the search space rooted at  $A$  until  $A$  is solved.  $C$  is currently the best child of  $A$  to examine because  $pn(C) = 1 < pn(B) = 2$ . On the other hand, when  $pn(C)$  increases and  $pn(B) < pn(C)$  holds,  $B$  will become the best child to examine. To capture this, DFPN sets  $th_{pn}(C) = 3$ . This indicates that, as long as  $pn(C) < 3$ ,  $C$  remains the best child.

At node  $C$ , DFPN calculates  $pn(C) = pn(F) + pn(G) = 1 < th_{pn}(C) = 3$ . DFPN still examines the search space rooted at  $C$ , and selects  $F$  because  $dn(F) < dn(G)$  ( $G$  is already proven). If  $pn(C) = pn(F) + pn(G) \geq th_{pn}(C)$  holds, DFPN must select  $B$ . That is, when  $pn(F) \geq th_{pn}(C) - pn(G)$  holds, DFPN must move to  $B$ , due to the fact that  $pn(B) < pn(C)$ . Therefore, DFPN sets  $th_{pn}(F) = th_{pn}(C) - pn(G) = 3$ .

Since  $pn(F) = \min(pn(H), pn(I)) = 1 < th_{pn}(F) = 3$ , DFPN can continue exploring the current path. Since  $pn(H) = pn(I) = 1$ , selecting either  $H$  or  $I$  looks equally promising. Assume that  $H$  is chosen for an examination. Since  $I$  becomes the best child when  $pn(H) > pn(I) = 1$  holds, DFPN sets  $th_{pn}(H) = 2$ .

As in Figure 2(right), DFPN expands  $H$  and recalculates  $pn(H) = pn(J) + pn(K) + pn(L) = 3 > th_{pn}(H) = 2$ . Therefore, DFPN updates  $pn(H) = 3$  and recalculates  $pn(F) = \min(pn(H), pn(I)) = 1 < th_{pn}(F)$ . DFPN selects  $I$ , which is the best child of  $F$ , and does not propagate the proof and disproof numbers back to  $A$ . DFPN sets  $th_{pn}(I) = \min(th_{pn}(F), pn(H) + 1) = 3$ , indicating that path  $A \rightarrow B$  becomes the best path when  $pn(I) \geq th_{pn}(I)$  holds.

To enable DFPN to examine search as illustrated here, DFPN selects a child  $s_1$  with the smallest (dis)proof number for a further examination, with the following thresholds:

- For OR node  $n$ ,  $th_{pn}(s_1) = \min(th_{pn}(n), pn(s_2) + 1)$ , and  $th_{dn}(s_1) = th_{dn}(n) - dn(n) + dn(s_1)$ .

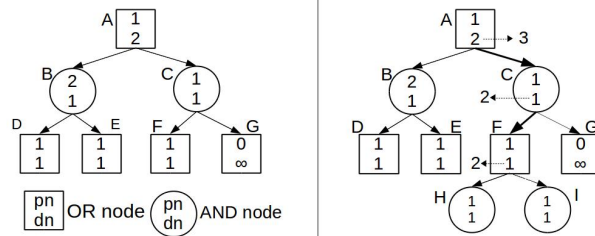

Figure 1: Example of PNS, adapted from the main paper

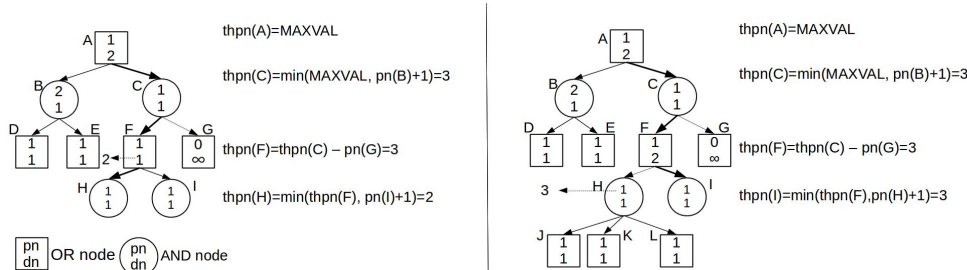

Figure 2: Example of DFPN

- For AND node  $n$ ,  $th_{pn}(s_1) = th_{pn}(n) - pn(n) + pn(s_1)$ , and  $th_{dn}(s_1) = \min(th_{dn}(n), dn(s_2) + 1)$ .

where  $s_2$  be a child with the second smallest (dis)proof number among a list of children of an OR (AND) node  $n$ . DFPN sets  $pn(s_2)$  and  $dn(s_2)$  to  $\infty$  if node  $n$  has only one child.

## 2 Pseudo Code of DFPN-E

Algorithms 1-2 show the pseudo code of DFPN-E. The essential differences from Nagai’s DFPN and from DFPN+ [2] are highlighted in blue bold (shown in bold in gray scale print). DFPN-E uses a heuristic function  $h(n, s)$  rather than a constant edge cost, additionally combined with a threshold controlling parameter  $\delta$  of Kishimoto and Müller [1] except that  $\delta$  is set to a constant in our DFPN-E implementation. The proof and disproof numbers of DFPN+ at leaf nodes are initialized by two evaluation functions  $h_{pn}(n)$  and  $h_{dn}(n)$ , while DFPN-E currently sets  $pn(n) = dn(n) = 1$  for the leaf nodes.

MAXVAL stands for a large integer.  $S(n)$  is a set of children of node  $n$ . Node  $n$  has 4-fields in addition to a state: a threshold for the proof number  $th_{pn}$ , a threshold for the disproof number  $th_{dn}$ , a proof number  $pn$  and a disproof number  $dn$ .  $TT$  is a transposition table that has fields to store a proof number  $pn$  and a disproof number  $dn$  in each transposition table entry. The hash key of node  $n$  is calculated by the Zobrist function [3], which is commonly used in the game research community.

The IsStartingMaterial method checks if a node  $n$  is a molecule in the starting material database. The NoApplicableReactionRule method checks if a node  $n$  has no reaction rules applicable to  $n$ . The GenerateChildren generates the children of  $n$ .

For the sake of simplicity, we omit more detailed, efficient pseudo code, such as finding  $s_{best}$  and  $s_2$  while calculating  $pn(n)$  and  $dn(n)$  in one single for-loop. This can be embodied without any difficulty, and our actual code implements it.

## References

- [1] A. Kishimoto and M. Müller. Search versus knowledge for solving life and death problems in Go. In AAAI, pages 1374–1379, 2005.

---

**Algorithm 1** DFPN-E

---

**Require:** Root node  $r$

```
1:  $r.thpn = r.thdn = \text{MAXVAL}$ 
2:  $pn = \text{Search}(r)$ 
3: if ( $pn = 0$ ) then
4:   return PROOF
5: else if ( $pn = \infty$ ) then
6:   return DISPROOF
7: else
8:   return UNKNOWN
9: end if
```

---

- 60 [2] A. Nagai. *Df-pn Algorithm for Searching AND/OR Trees and Its Applications*. PhD thesis, The  
61 University of Tokyo, 2002.
- 62 [3] A. L. Zobrist. A new hashing method with applications for game playing. Technical report,  
63 Department of Computer Science, University of Wisconsin, Madison, 1970. Reprinted in  
64 *International Computer Chess Association Journal*, 13(2):169-173, 1990.

---

**Algorithm 2** Search

---

**Require:** Node  $n$ 

```
1: if (IsStartingMaterial( $n$ )) then
2:    $TT[n].pn = 0$ ;  $TT[n].dn = \infty$  //Proven terminal node
3:   return 0
4: else if (NoApplicableReactionRule( $n$ )) then
5:    $TT[n].pn = \infty$ ;  $TT[n].dn = 0$  //Disproven terminal node
6:   return  $\infty$ 
7: end if
8: GenerateChildren( $n$ )
9: if ( $n$  is an OR node) then
10:  loop
11:     $n.dn = \sum_{s \in S(n)} s.dn$  //Calculate  $dn(n)$  for an internal OR node
12:    if ( $n.dn = \infty$ ) then
13:       $n.pn = 0$  //Proven internal OR node
14:    else
15:       $n.pn = \min_{s \in S(n)} (h(n, s) + s.pn)$  //Calculate  $pn(n)$  with heuristic edge cost initialization
16:    end if
17:     $TT[n].pn = n.pn$ ;  $TT[n].dn = n.dn$  //Store updated search result
18:    if ( $n.thpn \leq n.pn \vee n.thdn \leq n.dn$ ) then
19:      break
20:    end if
21:     $s_{best} = \arg \min_{s \in S(n)} (h(n, s) + s.pn)$ ;  $s_2 = \arg \min_{s \in S(n) \setminus \{s_{best}\}} (h(n, s) + s.pn)$ 
22:     $s_{best}.thpn = \min(n.thpn, s_2.pn + \delta) - h(n, s_{best})$ ;
23:     $s_{best}.thdn = n.thdn - n.dn + s_{best}.dn$ 
24:    Search( $s_{best}$ )
25:  end loop
26: else
27:  loop
28:     $n.pn = \sum_{s \in S(n)} s.pn$  // $n$  is an AND node
29:     $n.dn = \min_{s \in S(n)} s.dn$ 
30:     $TT[n].pn = n.pn$ ;  $TT[n].dn = n.dn$  //Store updated search result
31:    if ( $n.thpn \leq n.pn \vee n.thdn \leq n.dn$ ) then
32:      break
33:    end if
34:     $s_{best} = \arg \min_{s \in S(n)} s.dn$ ;  $s_2 = \arg \min_{s \in S(n) \setminus \{s_{best}\}} s.dn$ 
35:     $s_{best}.thpn = n.thpn - n.pn + s_{best}.pn$ 
36:     $s_{best}.thdn = \min(n.thdn, s_2.dn + 1)$ ;
37:    Search( $s_{best}$ )
38:  end loop
39: end if
40: return  $n.pn$ 
```

---
